# Supplementary material
Source: PubMed Central journal article supplement (PMC7456601)
Supplement: NIHMS1619866-supplement-Table_S1_and_S2.pdf [file NIHMS1619866-supplement-Table_S1_and_S2.pdf]

## **Obestatin and adropin in Prader-Willi syndrome and non-syndromic obesity: associations with weight, BMI-z, and HOMA-IR**

Camila E. Orsso<sup>1</sup>, Andrew A. Butler<sup>2</sup>, Michael J. Muehlbauer<sup>3</sup>, Huaxia N. Cui<sup>3</sup>, Daniela A. Rubin<sup>4</sup>,  
Mohammadreza Pakseresht<sup>1</sup>, Merlin G. Butler<sup>5</sup>, Carla M. Prado<sup>1</sup>, Michael Freemark<sup>6</sup> and Andrea M.  
Haqq<sup>1,7</sup>.

<sup>1</sup>Department of Agricultural, Food and Nutritional Science, University of Alberta, Edmonton, AB, Canada; <sup>2</sup>Department of Pharmacology and Physiology, Saint Louis University School of Medicine, Saint Louis University, St. Louis, MO, USA; <sup>3</sup>Sarah W. Stedman Nutrition and Metabolism Center, Duke University Medical Center, Durham, NC, USA; <sup>4</sup>Dept. of Kinesiology, California State University, Fullerton, CA, USA; <sup>5</sup>Departments of Psychiatry, Behavioral Sciences, and Pediatrics, Kansas University Medical Center, Kansas city, Kansas, USA; <sup>6</sup>Division of Pediatric Endocrinology, Duke University Medical Center, Durham, NC, USA; <sup>7</sup>Department of Pediatrics, University of Alberta, Edmonton, AB, Canada

**Corresponding author:** Dr. Andrea M. Haqq, Department of Pediatrics, 1C4.09 Walter C. Mackenzie Centre, 8440-112 Street NW, Edmonton, AB T6G 2R7, Canada. Email: [haqq@ualberta.ca](mailto:haqq@ualberta.ca)

**Table S1:** Obestatin and adropin concentrations in children with Prader-Willi syndrome according to subtype and growth hormone treatment.

|                          | PWS subtype                   |                               |                      | GH treatment                  |                               |                      |
|--------------------------|-------------------------------|-------------------------------|----------------------|-------------------------------|-------------------------------|----------------------|
|                          | UPD<br>(n = 7)                | Deletion<br>(n = 13)          | P-value <sup>†</sup> | GH treated<br>(n = 9)         | non-GH treated<br>(n = 5)     | P-value <sup>†</sup> |
| <b>Obestatin (pg/mL)</b> | 4052.00<br>(2506.00, 4691.00) | 2577.00<br>(2042.00, 3475.00) | 0.30                 | 3339.00<br>(2933.50, 4062.50) | 3331.00<br>(3099.50, 3766.00) | 0.70                 |
| <b>Adropin (ng/mL)</b>   | 3.90 (2.90, 6.82)             | 3.53 (2.45, 5.06)             | 0.42                 | 2.70 (2.07, 6.03)             | 2.71 (2.23, 3.14)             | 1.00                 |

GH, growth hormone; PWS, Prader-Willi syndrome; UPD, uniparental disomy.

<sup>†</sup> P-values determined using Mann-Whitney U test.

**Table S2:** Hormonal and metabolic characteristics of children with Prader-Willi syndrome and controls who were insulin resistant.

|                          | <b>PWS children with IR<br/>(n = 7)</b> | <b>Control children with IR<br/>(n = 13)</b> | <b>P-value<sup>†</sup></b> |
|--------------------------|-----------------------------------------|----------------------------------------------|----------------------------|
| <b>Obestatin (pg/mL)</b> | 3472.00 (3146.00, 3764.00)              | 3505.00 (2978.00, 4194.50)                   | 0.50                       |
| <b>Adropin (ng/mL)</b>   | 2.68 (1.78, 3.43)                       | 2.03 (1.39, 3.10)                            | 0.22                       |
| <b>Ghrelin (pg/mL)</b>   | 1266.03 (881.32, 1525.80)               | 827.66 (706.09, 886.66)                      | <b>&lt;0.005</b>           |
| <b>Ghrelin:Obestatin</b> | 0.34 (0.30, 0.46)                       | 0.20 (0.17, 0.29)                            | <b>0.01</b>                |
| <b>Leptin (ng/mL)</b>    | 40.76 (30.26, 67.34)                    | 37.09 (14.48, 54.91)                         | 0.66                       |
| <b>Insulin (μIU/mL)</b>  | 29.38 (15.91, 36.71)                    | 23.84 (19.39, 36.30)                         | 0.92                       |
| <b>Glucose (mg/dl)</b>   | 86.00 (78.25, 99.00)                    | 95.50 (87.50, 99.63)                         | 0.18                       |
| <b>HOMA-IR</b>           | 5.68 (3.89, 9.27)                       | 5.24 (4.19, 9.22)                            | 0.78                       |

HOMA-IR, Homeostatic model assessment-insulin resistance; PWS, Prader-Willi syndrome; IR, Insulin resistance.

Data are presented as median (25th percentile, 75th percentile). Statistically significant differences are in bold type ( $p \leq 0.05$ ).

<sup>†</sup> P-values determined using independent t-test (Pearson).
